# Supplementary material for: Structural, magnetic and Mössbauer spectroscopic studies of the [Fe(3-bpp)2](CF3COO)2 complex: role of crystal packing leading to an incomplete Fe(ii) high spin ⇋ low spin transition
Source: Royal Society of Chemistry journal article supplement (doi:10.1039/d0ce01687j), 2021-01-01
Supplement: d0ce01687j1.pdf [file d0ce01687j1.pdf]

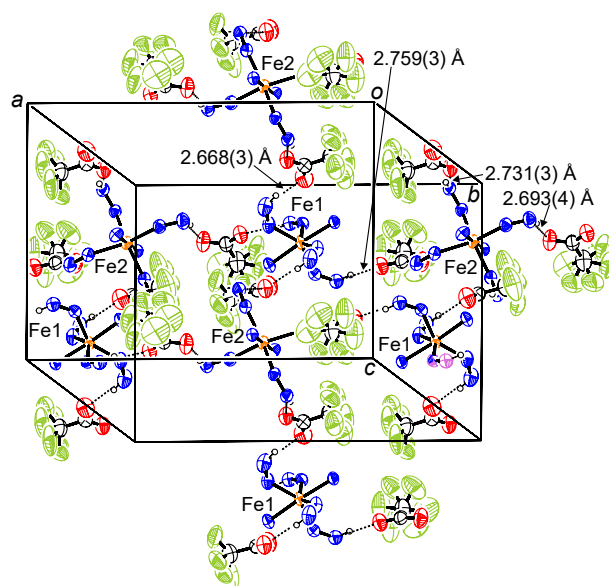

**Fig. S1 3D hydrogen bond network of 1 at 300 K.**

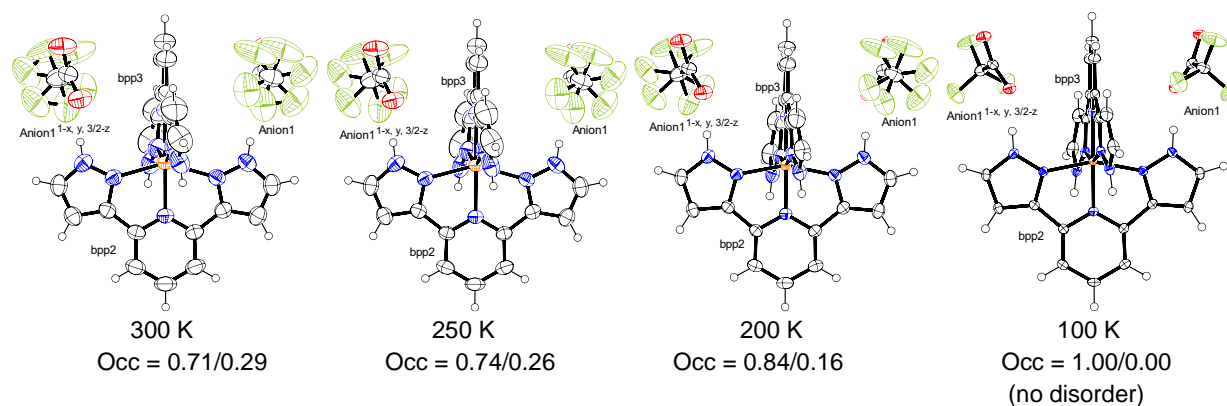

**Fig. S2 A projection normal to the bpp2 plane.**

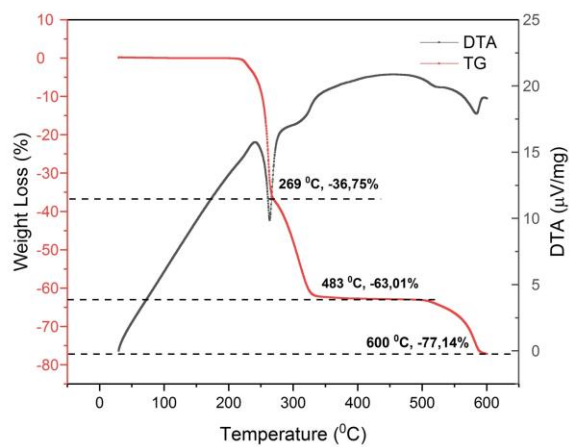

**Fig. S3 TG-DTA profiles of 1.**

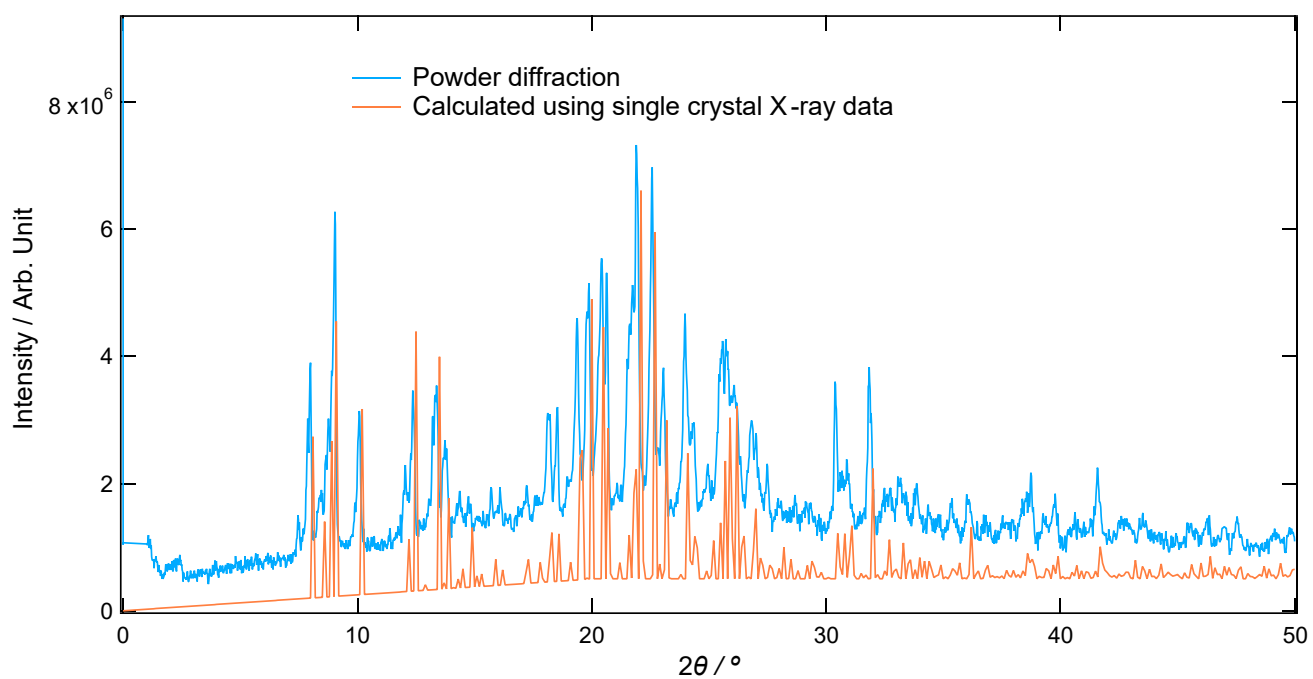

**Fig. S4 Powder X-ray diffraction of 1 with the estimated powder diffraction using single crystal X-ray data.**

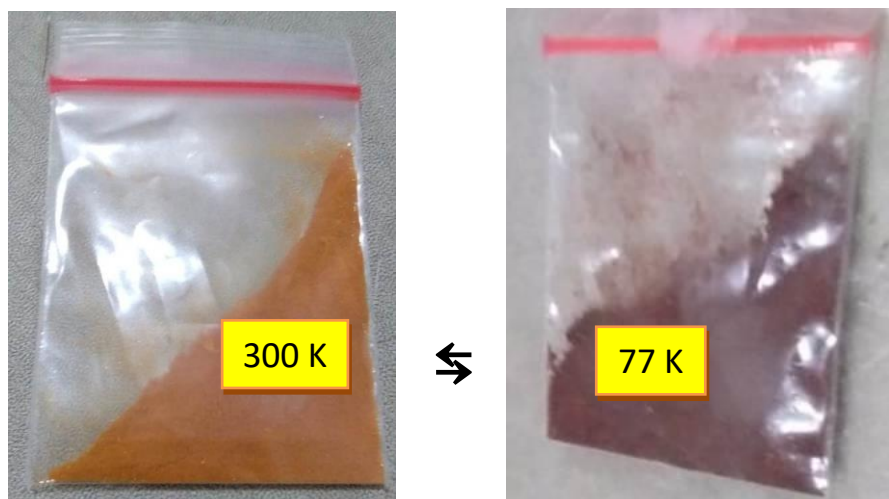

Fig. S5 Colour of 1 at 300 K and 77 K.
